# Supplementary material for: NIPBL: a new player in myeloid cell differentiation
Source: PubMed Central journal article supplement — Haematologica. 2019 Jan 10;104(7):1332–41. doi: 10.3324/haematol.2018.200899 (PMC6601076; doi:10.3324/haematol.2018.200899), 2019-07
Supplement: 2018_200899-Dislcosures_and_Contributions.pdf [file 2018_200899-Dislcosures_and_Contributions.pdf]

Haematologica  
HAEMATOL/2018/200899  
Version 4

NIPBL: a new player in myeloid cells differentiation

Mara Mazzola, Gianluca Deflorian, Alex Pezzotta, Laura Ferrari, Grazia Fazio, Erica Bresciani, Claudia Saitta, Luca Ferrari, Monica Fumagalli, Matteo Parma, Federica Marasca, Beatrice Bodega, Paola Riva, Franco Cotelli, Andrea Biondi, Anna Marozzi, Gianni Cazzaniga, and Anna Pistocchi

Disclosures: None

Contributions: Author contributions: conceived and designed the experiments: AP, MM, GDF, LF, EB. Provide patient samples: MP, MF. Performed the experiments on human samples: CS, GF. Performed the experiments in zebrafish: MM, AP, AP, LF, LF, GDF. Performed the FACS sorting: FM, BB. Analyzed the data on human sample: GF, CS, GC, AB. Analysed the data in zebrafish: MM, AP, AP, LF, PR, AM, GDF, LF, EB, FC. Wrote the paper: AP, EB, AM. Supervised the research project and paper drafting: AP.
