# Supplementary material for: NIPBL: a new player in myeloid cell differentiation
Source: PubMed Central journal article supplement — Haematologica. 2019 Jan 10;104(7):1332–41. doi: 10.3324/haematol.2018.200899 (PMC6601076; doi:10.3324/haematol.2018.200899), 2019-07
Supplement: HAEMATOL-2018-200899v4-Mazzola-01.pdf [file HAEMATOL-2018-200899v4-Mazzola-01.pdf]

# The NIPBL/NPM1 interplay regulates myeloid differentiation in zebrafish and humans through the canonical Wnt pathway and the dysregulation of these interactions may drive to leukemic transformations

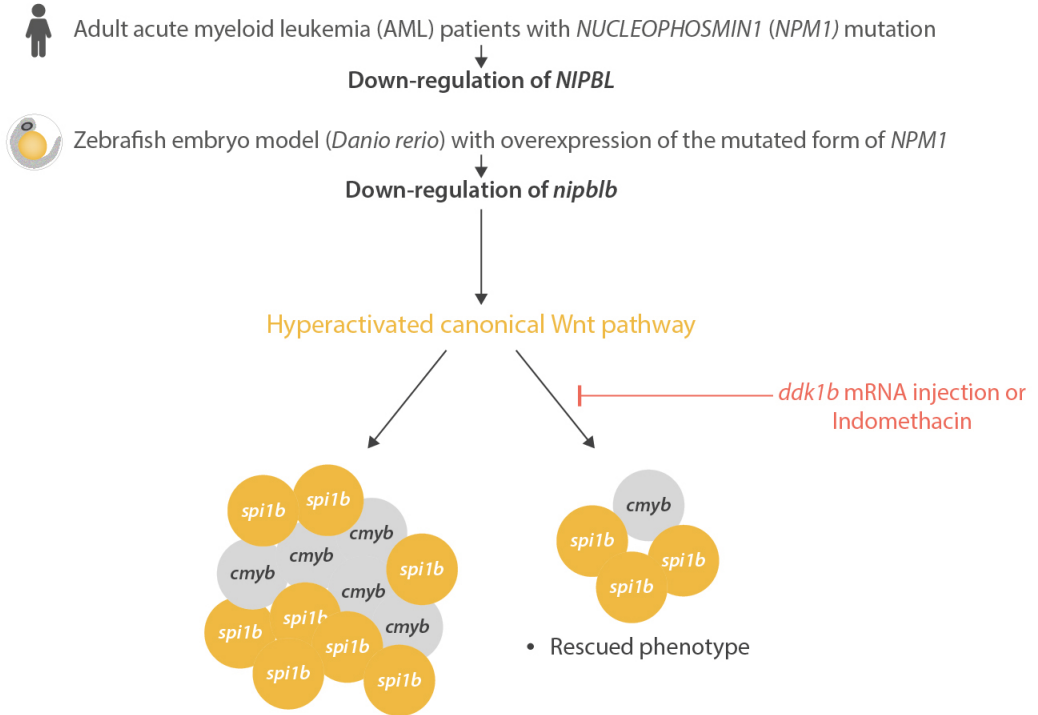

- Impaired myeloid differentiation
- Increased number of myeloid precursors
- Decreased number of myeloid mature cells
